# Supplementary material for: A dilute ferromagnetic ZrO2/carbon nanocomposite derived from a zirconium-based metal–organic framework for high-performance electromagnetic wave absorption
Source: Royal Society of Chemistry journal article supplement (doi:10.1039/d4tc03010a), 2024-01-01
Supplement: d4tc03010a1.pdf [file d4tc03010a1.pdf]

## Supporting Information

### Dilute Ferromagnetic ZrO<sub>2</sub>/Carbon Nanocomposite Derived from Zirconium-Based Metal-Organic Framework for High-Performance Electromagnetic Wave Absorption

Kun Zhang<sup>†,¶,\*</sup>, Xiaoyu Zhao<sup>†</sup>, Fengyi Zhang<sup>†</sup>, Yaxin Wang<sup>†,\*</sup>, Yongjun Zhang<sup>†,¶</sup>

<sup>†</sup>School of Materials and Environmental Engineering, Hangzhou Dianzi University, Hangzhou 310018, China

<sup>¶</sup>Hangzhou Dianzi University Shangyu Institute of Science and Engineering, Shaoxing 312300, China

#### Characterization Section

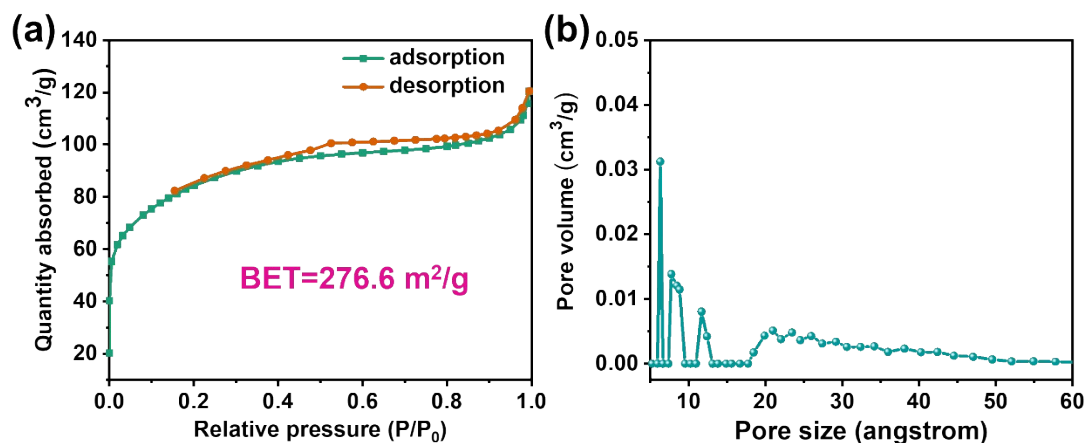

Figure S1. N<sub>2</sub> adsorption-desorption isotherms and pore size distribution of ZrO<sub>2</sub>/C<sub>700</sub>.

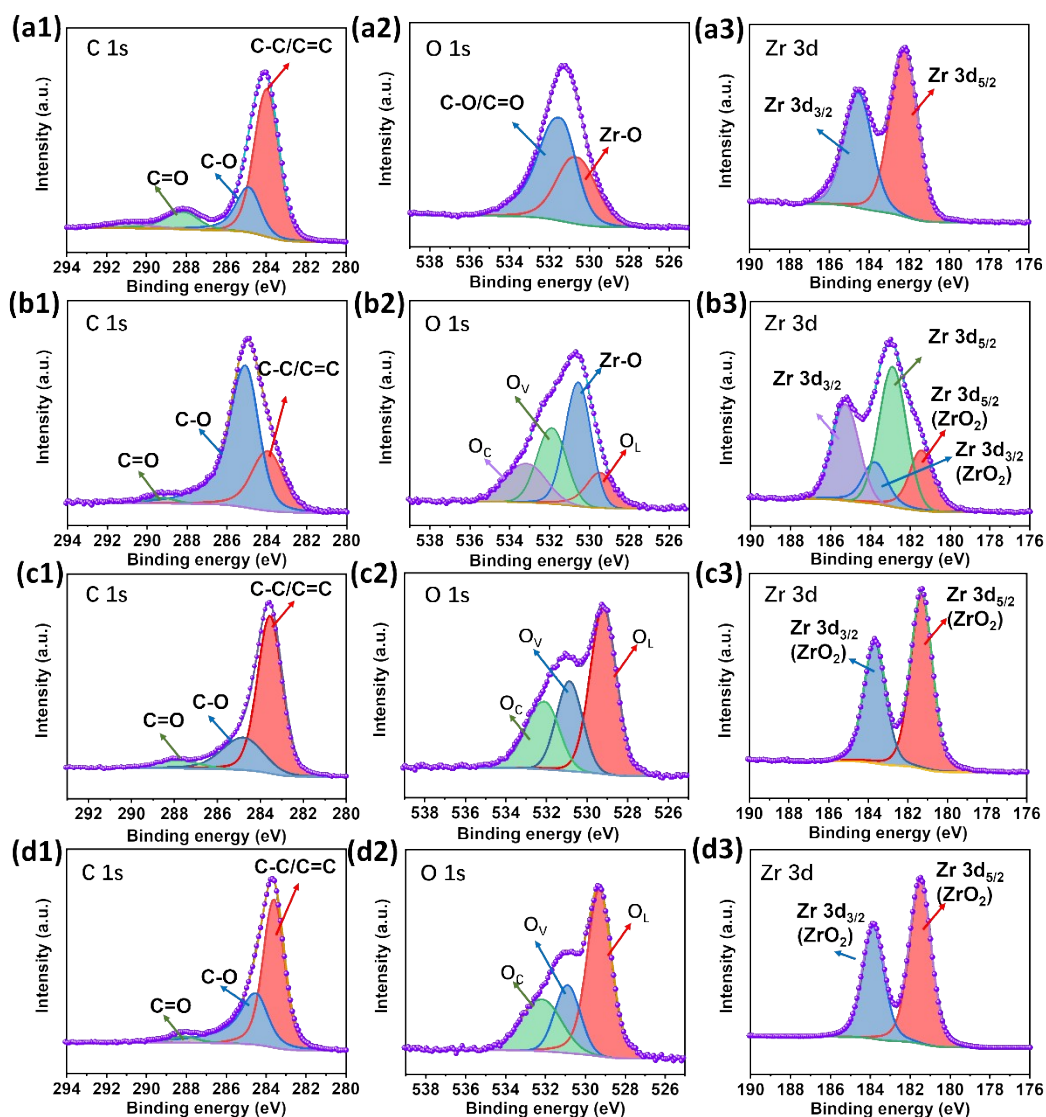

Figure S2. High-resolution XPS spectra of C 1s, O 1s, and Zr 3d of NU-1000 (a1-a3), ZrO<sub>2</sub>/C\_600 (b1-b3), ZrO<sub>2</sub>/C\_700 (c1-c3), and ZrO<sub>2</sub>/C\_800 (d1-d3).

Table S1. The saturation magnetization ( $M_s$ ) and coercivity ( $H_c$ ) values and the calculated  $M_s/H_c$  ratio of Zn@NiCo-Lc-1, Zn@NiCo-Lc-2, Zn@NiCo-Lc-3, and Zn@NiCo-Lc-4.

| Samples                 | $M_s$ (emu/g) | $H_c$ (Oe) | $M_s/H_c$ (emu·g <sup>-1</sup> ·kOe <sup>-1</sup> ) |
|-------------------------|---------------|------------|-----------------------------------------------------|
| ZrO <sub>2</sub> /C_600 | 0.23          | 352.1      | 0.65                                                |
| ZrO <sub>2</sub> /C_700 | 0.33          | 244.5      | 1.35                                                |

---

|                         |      |       |      |
|-------------------------|------|-------|------|
| ZrO <sub>2</sub> /C_800 | 0.22 | 356.2 | 0.62 |
|-------------------------|------|-------|------|

---
